# Supplementary material for: A look at the precision, sensitivity and specificity of SARS-CoV-2 RT-PCR assays through a dedicated external quality assessment round
Source: publisher site journal article supplement (doi:10.1515/cclm-2021-1004), 2021-10-20
Supplement: Supplementary file 1 [file j_cclm-2021-1004_suppl.docx]

**Supplement 1: Assays (reagent + platform) represented in four rounds of the EQA scheme “SARS-CoV-2 virus genome detection” and the total and false negative results reported by them.**

Total counts of reported results in all four rounds; and the incorrect results in the 1st/2nd/3rd/4th rounds in parentheses.

Abbott RT Sars-CoV-2 + AB 7500 Fast (3; 0/0/0/0)

Abbott RT Sars-CoV-2 + Abbott/Alinity (12; 0/0/0/0)

Abbott RT Sars-CoV-2 + ABI 7500 (9; 1/0/0/0)

Alinity m SARS-Cov-2 Assay + Abbott/Alinity (25; 0/0/1/0)

Allpex 2019-nCoV (Seegene) + CFX96 Touch (44; 1/0/0/0)

Anchor SARS-CoV-2 PCR Kit + CFX96 Touch (8; 0/0/0/0)

ANDiS FAST SARS-CoV-2 RT-qPCR Detection Kit + Gentier 96 Real-Time PCR System (4; 0/0/0/0)

Aptima SARS-CoV-2-Assay + Hologic Panther (43; 0/0/0/0)

BD MAX SARS-CoV-2 + BD MAX (28; 0/0/0/0)

BioGX SARS-CoV-2 HMP + BD MAX (4; 0/0/0/0)

Brilliant III Ultra-Fast QPCR Master Mix + AriaMX (Aligent) (15; 1/0/0/0)

cobas Liat SARS-CoV-2 und Influenza A/b + cobas Liat (66; 0/0/0/0)

cobas SARS-CoV-2 + Roche/Cobas 6800 (105; 0/0/0/0)

cobas SARS-CoV-2 + Roche/Cobas 8800 (8; 0/0/0/0)

cobas SARS-CoV-2 + Roche/Cobas z 480 (3; 0/1/0/0)

Convergys POC RT-PCR- SARS-CoV-2 + Convergys POC RT-PCR (22; 0/0/0/0)

COVID-19 AIGS Detection Kit + Life Ready 1000 (7; 1/0/0/0)

COVID-19 Nucleic acid (RNA) Detection Kit + Life Ready 1000 (17; 0/0/0/0)

Easy SARS-Cov-2 Kit + Easy PGX (9; 0/0/0/0)

EliGene COVID 19 Basic A RT + CFX96 Touch (8; 1/0/0/0)

EliGene COVID 19 Basic A RT + Roche/Cobas z 480 (3; 0/0/0/0)

EliGene COVID 19 Basic A RT + Rotor Gene Q (3; 0/0/0/0)

FTD SARS CoV-2 + QuantStudio 5 (9; 0/0/0/0)

FTD SARS CoV-2 + VERSANT kPCR Amp and Detection module (12; 0/0/0/0)

Genefinder Covid-19 Plus + Elite Igenius (9; 0/0/0/0)

genesig Real-Time PCR + CFX96 Touch (3; 1/0/0/0)

genesig Real-Time PCR + LightCycler 480 (15; 0/0/0/1)

genesig Real-Time PCR + Roche/Cobas z 480 (3; 1/0/0/0)

GenomeCoV19 Detection kit + Q-Tower Analytik Jena (12; 0/0/0/0)

GenomEra Sars-CoV-2 + Genomera (3; 1/0/0/0)

in house + ABI 7500 (3; 0/0/0/0)

in house + Bio-Rad T100 (5; 0/0/0/0)

in house + CFX96 Touch (8; 0/0/0/0)

in house + LineGene 9600 (5; 0/0/0/0)

in house + Mastercycler nexus (15; 0/0/0/0)

in house + Q-Tower Analytik Jena (27; 0/0/0/0)

in house + Stratagene MX 3005p (8; 0/0/0/0)

Light Mix Modular + LightCycler 480 (30; 1/0/0/0)

Light Mix Modular + Roche/Cobas z 480 (11; 0/0/0/0)

Luna Universal Probe One-Step + CFX96 Touch (3; 1/0/0/0)

Luna Universal Probe One-Step + Q-Tower Analytik Jena (18; 0/0/0/0)

Luna Universal/ One-Step-RT-qPCR (Covid) + Applied Biosystem QS7 (8; 0/0/0/0)

Luna Universal/ One-Step-RT-qPCR (Covid) + CFX96 Touch (12; 0/0/0/0)

Luna Universal/ One-Step-RT-qPCR (Covid) + Q-Tower Analytik Jena (3; 0/0/0/0)

Luna Universal/ One-Step-RT-qPCR (Covid) + QuantStudio 5 (4; 0/0/0/0)

Multiplex RNA Virus Master Kit + Roche/Cobas z 480 (9; 0/0/0/0)

MutaPlex RT-PCR Kit + CFX96 Touch (3; 2/0/0/0)

MutaPlex RT-PCR Kit + MIC (10; 2/0/0/1)

nCov-19 QLP 2.1 RT-PCR Kit + Gentier 48 Real-Time PCR System (4; 0/0/0/0)

nCov-IP4 (Pasteur) + Stratagene MX 3005p (3; 0/0/0/0)

NEB 2x RT-Lamp- Mastermix + CFX96 Touch (3; 0/0/0/0)

NeuMoDx SARS-CoV-2 Test Strip + NeuMoDX (20; 0/0/0/0)

PerkinElmer SARS-CoV-2 Real-time RT-PCR Assay + LineGene 9600 (4; 0/0/0/0)

PhoenixDX + AB 7500 Fast (3; 1/0/0/0)

PhoenixDX + Elite Igenius (3; 0/1/0/0)

PhoenixDX + MIC (5; 0/0/0/0)

PhoenixDX + QuantStudio 5 (19; 0/0/0/4)

PhoenixDX + ViiA 7 (6; 1/1/0/0)

Primer Design + CFX96 Touch (3; 0/0/0/0)

QIAprep&amp Viral RNA + CFX96 Touch (5; 0/0/1/0)

RADI Covid-19 Detection Kit + 7900HT Fast Real Time PCR (3; 0/0/0/0)

Real AccurateR Quadruplex SARS-CoV-2 Multiplex RT- + MIC (12; 0/0/0/0)

Real Fast PCR + CFX96 Touch (12; 0/0/0/0)

Real Star R + Altostar DT16 (3; 0/0/0/0)

Real Star R Altona + ABI 7500 (3; 0/0/0/0)

Real Star R Altona + Altostar DT16 (3; 0/0/0/0)

Real Star R Altona + CFX96 Touch (12; 0/2/0/0)

Real Star R Altona + Light Cycler 96/Roche (12; 0/1/0/0)

Real Star R Altona + LightCycler 480 (21; 1/0/0/0)

Real Star R Altona + Roche/Cobas z 480 (6; 1/0/0/0)

Real Star R Altona + Rotor Gene Q (6; 0/0/0/0)

Reliance One-Step Multiplex Supermix + CFX96 Touch (15; 1/0/0/0)

Rida Gene + LightCycler 480 (3; 0/0/0/0)

Rida Gene + Roche/Cobas z 480 (6; 0/0/0/0)

SARS-CoV-2 ELITe + Elite Igenius (4; 0/0/0/0)

SARS-CoV-2-N+RdRp Cubedx + Rotor Gene Q (8; 0/0/0/0)

SARS-CoV-2-Panel-Agena + MassARRAY/Agena Bioscinece (19; 0/0/1/0)

SARS-CoV-RealFast Assay/ViennaLab + LightCycler 480 (9; 0/0/0/0)

SARS-CoV-RealFast Assay/ViennaLab + Roche/Cobas z 480 (8; 0/0/0/0)

SIMPLEXA Covid-19 Direct Reaction Mix + SIMPLEXA Liaison MDX Realtime PCR (51; 0/0/0/0)

TaqMan + CFX96 Touch (3; 0/0/0/0)

TaqMan + NeuMoDX (3; 0/0/0/0)

TaqMan Fast Virus1Step MasterMix + CFX96 Touch (4; 0/0/0/0)

TaqMan Fast Virus1Step MasterMix + Gentier 96 Real-Time PCR System (4; 0/0/0/0)

TaqPath Covid 19 + QuantStudio 5 (9; 0/0/1/0)

TaqPath TM + QuantStudio 12k flex (15; 1/0/0/0)

Thermofisher Acrobiosystems + QuantStudio 5 (3; 1/0/0/0)

TIB MOLBIOL Light MIX + ABI 7500 (18; 0/0/0/0)

TIB MOLBIOL Light MIX + LightCycler 480 (39; 1/0/0/0)

TIB MOLBIOL Light MIX + Panther Fusion (9; 0/0/0/0)

Viasure SARS-CoV-2 (S gene) + BD MAX (6; 1/0/0/0)

Virella SARS-CoV-2 seqc RT-PCR Kit 2.0 + CFX96 Touch (4; 0/0/0/0)

Virella SARS-CoV-2 seqc RT-PCR Kit 2.0 + LightCycler 480 (8; 0/0/0/0)

Virella SARS-CoV-2 seqc RT-PCR Kit 2.0 + Rotor Gene Q (3; 0/1/0/0)

ViroReal Ingenetix + CFX96 Touch (1; 1/0/0/0)

ViroReal Ingenetix + LightCycler 480 (4; 4/0/0/0)

ViroReal Ingenetix + MIC (1; 1/0/0/0)

ViroReal Ingenetix + Roche/Cobas z 480 (2; 0/0/2/0)

ViroReal Kit SARS-CoV-2 & SARS + CFX96 Touch (24; 0/0/0/0)

ViroReal Kit SARS-CoV-2 & SARS + keines (3; 0/0/0/0)

ViroReal Kit SARS-CoV-2 & SARS + LightCycler 480 (46; 0/0/0/0)

ViroReal Kit SARS-CoV-2 & SARS + Magnetic induction cycler (4; 0/0/0/0)

ViroReal Kit SARS-CoV-2 & SARS + MIC (10; 0/0/0/0)

ViroReal Kit SARS-CoV-2 & SARS + Q-Tower Analytik Jena (12; 0/0/0/0)

ViroReal Kit SARS-CoV-2 & SARS + Roche/Cobas z 480 (22; 0/0/0/0)

VitaPCR SARS-CoV-2 Assay + VitaPCR (69; 0/3/2/2)

Vivalytic RTI + Vivalytic/Bosch (4; 0/0/0/0)

Xpert Xpress SARS-CoV-2 + GeneXpert (316; 0/0/1/0)

Xpert Xpress SARS-CoV-2/Flu/RSV + GeneXpert (96; 0/0/1/0)
